# Supplementary material for: The Use of Telepsychiatry to Provide Cost-Efficient Care During Pediatric Mental Health Emergencies
Source: Atypon-hosted journal article supplement (doi:10.1176/appi.ps.201700140), 2017-10-16
Supplement: appi.ps.201700140.ds001.pdf [file appi.ps.201700140.ds001.pdf]

**APPENDIX: Online Supplement**

**Figure. Network of Care Telemedicine Flow for Psychiatry Emergency Consultation**

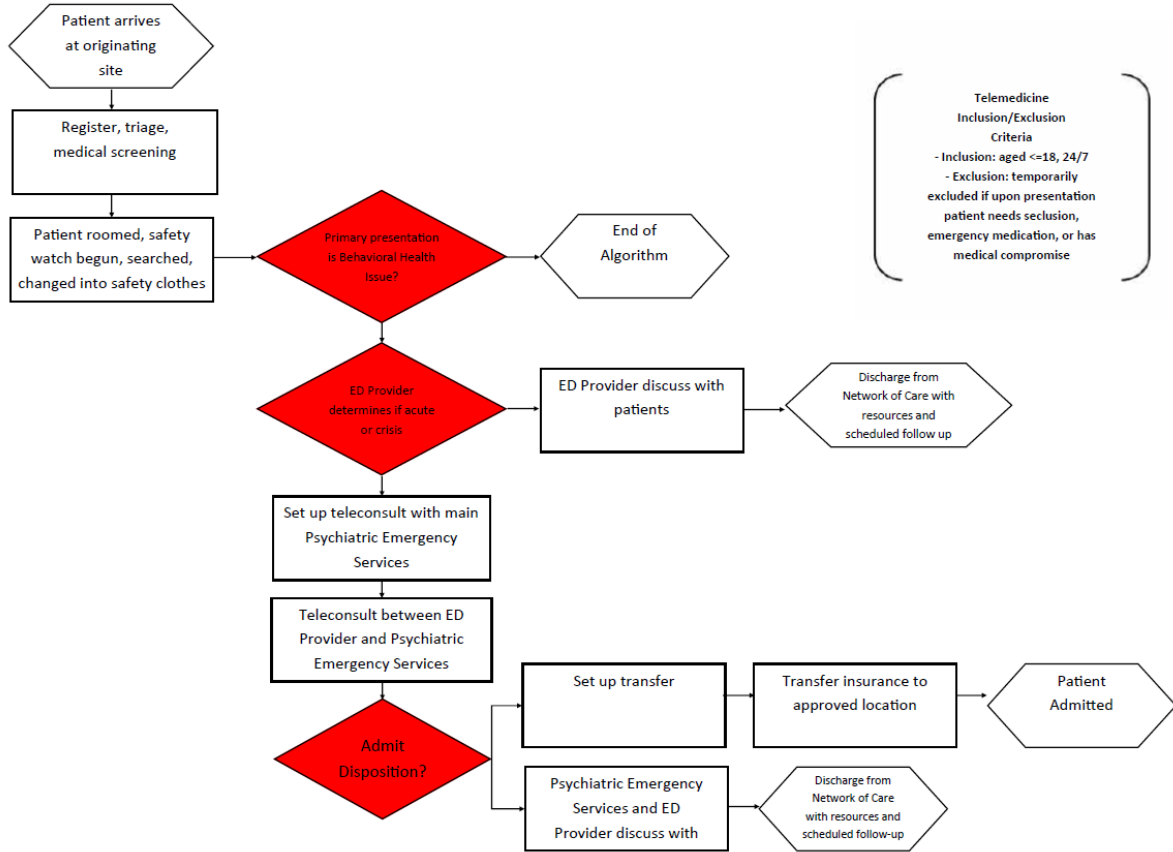

Children’s Hospital Colorado (CHCO) Network of Care Locations and Estimated Travel Time to Main and Logistic Regression Models for Inpatient Admission and Return to ED within 72 hours.

| Network of care site                               | Distance to CHCO Main Hospital (miles) | Estimated driving time on Google Maps (minutes) |
|----------------------------------------------------|----------------------------------------|-------------------------------------------------|
| 1 Children’s Hospital South Campus                 | 23                                     | 34                                              |
| 2 Children’s Hospital North Campus                 | 33                                     | 36                                              |
| 3 Children’s Hospital at Parker Adventist Hospital | 21                                     | 32                                              |
| 4 Children’s Hospital Uptown Denver                | 7.9                                    | 22                                              |
| 5 Children’s Hospital Wheatridge                   | 19                                     | 35                                              |
| <b>Total Average</b>                               | <b>20.8</b>                            | <b>31.8 minutes</b>                             |

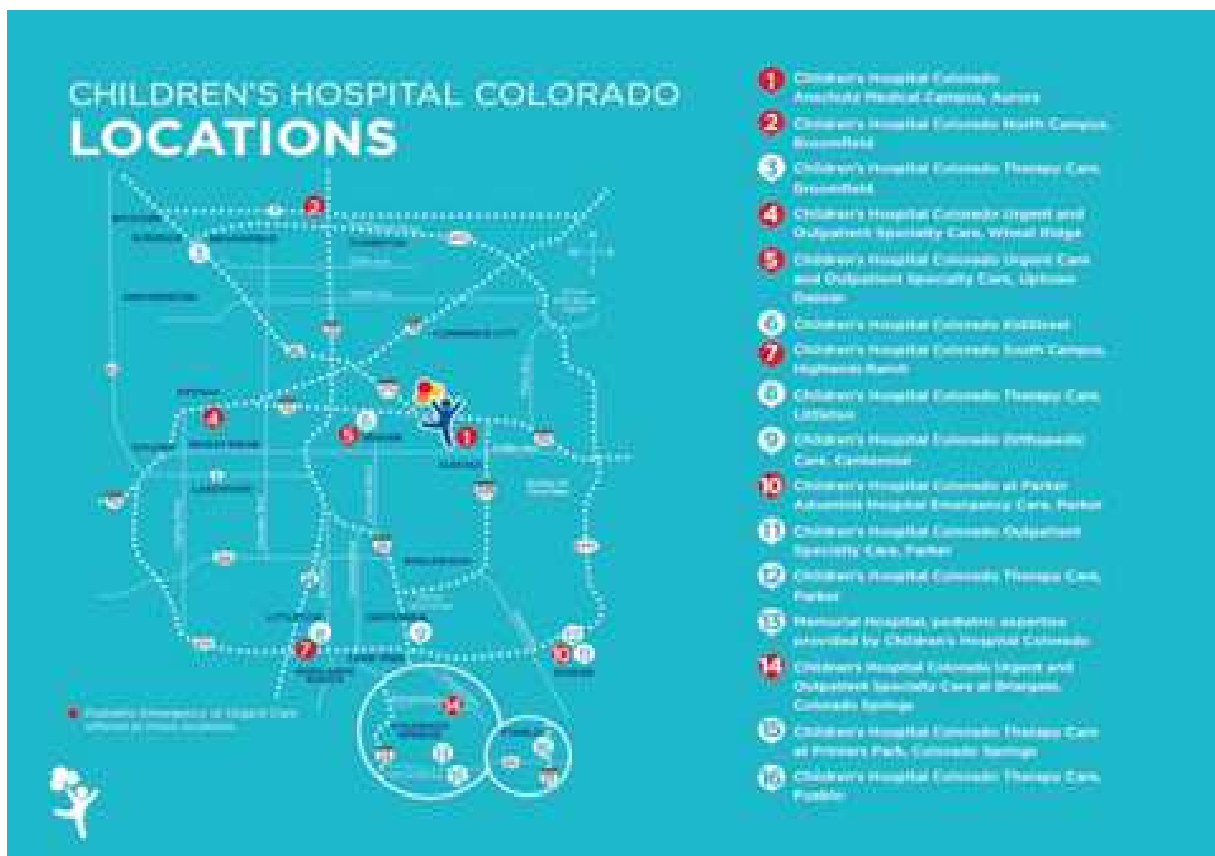

Because the rates of inpatient admission was higher for the telepsychiatry arm compared to the treatment as usual arm, we adjusted for observable characteristics using a stepwise process. After adjusting for observables, there was a still a significant ( $p < .001$ ) decrease in the odds of being admitted in the telepsychiatry arm. This Odds ratio corresponds to a **.76** relative risk ratio for telepsychiatry compared to treatment as usual (transport to main hospital for in person consultation).

**Logistic regression multiple variable model: Likelihood of Inpatient Admission**

**Sample Size N=494**

**# events (inpatient stay): 242**

**C-index: .66**

**Hosmer Lemeshow Test: 10.2 (p=.25)**

| Step | Variable                             | OR               | P-value |
|------|--------------------------------------|------------------|---------|
| 1    | Age Group ( $\geq 13$ vs $< 13$ )    | 2.34 (1.55-3.53) | <.001   |
| 2    | Telepsychiatry video consultation    | .59 (.40-.86)    | .005    |
| 3    | Non-White vs. White                  | 1.68 (1.07-2.64) | .024    |
| 4    | Diagnosis (SIWP vs. Other)           | 1.75 (.94-3.23)  | .189    |
|      | Diagnosis (Self/Other Harm vs Other) | 1.31 (.76-2.27)  |         |
| 5    | Female vs. Male                      | 1.26 (.86-1.86)  | .244    |
| 6    | Private Insurance vs No              | .97 (.67-1.42)   | .888    |

To further check for selection bias (and to explore the shift away from inpatient admission associated with telepsychiatry), another logistic model for telepsychiatry was run with little effect from patient characteristics.

**Likelihood of Telepsychiatry Video Consultation Usage**

**Sample Size N=494**

**# events (telehealth usage): 226**

**C-index: .60**

**Hosmer Lemeshow Test: 5.14 (p=.64)**

| Step | Variable                             | OR               | P-value |
|------|--------------------------------------|------------------|---------|
| 1    | Private Insurance vs No              | 1.55 (1.07-2.25) | .020    |
| 2    | Non-White vs. White                  | .66 (.42-1.02)   | .064    |
| 3    | Diagnosis (SIWP vs. Other)           | 1.17 (.65-2.12)  | .182    |
|      | Diagnosis (Self/Other Harm vs Other) | .79 (.47-1.34)   |         |
| 4    | Age Group ( $\geq 13$ vs $< 13$ )    | .82 (.55-1.22)   | .332    |
| 5    | Female vs. Male                      | .83 (.57-1.21)   | .335    |

In regard to possible effects on safety of telepsychiatry, we coded charts for ED readmission within 72 hours.

|                   | With Telehealth | Without Telehealth |
|-------------------|-----------------|--------------------|
| No return visit   | 198 (85.3%)     | 242 (90.3%)        |
| Return < 72 hours | 0 (.0%)         | 1 (.4%)            |
